# Supplementary material
Source: PubMed Central journal article supplement (PMC5591436)

# The biosynthetic genes encoding for the production of the dynemicin enediyne core in *Micromonospora chersina* ATCC53710

Qunjie Gao and Jon S. Thorson

## Supplemental Data

**Table S1. Bacterial strains, plasmids and primers used in this study.**

| Strain/Plasmid            | Characteristics                                                                                      | Reference  |
|---------------------------|------------------------------------------------------------------------------------------------------|------------|
| <b><i>E. coli</i></b>     |                                                                                                      |            |
| DH5 $\alpha$              | Host for general cloning                                                                             | Invitrogen |
| NovaBlue                  | Host for general cloning                                                                             | Novagen    |
| XL1-Blue MRF <sup>+</sup> | Genomic library host                                                                                 | Stratagene |
| BW25113                   | Propagation strain for plasmid pJ790 and <i>M. chersina</i> cosmids                                  | This work  |
| S17-1                     | Donor strain for conjugation between <i>E.coli</i> and <i>Streptomyces</i>                           | This work  |
| <b><i>M. chersina</i></b> |                                                                                                      |            |
| ATCC53710                 | Wild type strain, <b>8</b> producer                                                                  | This work  |
| QGD01                     | <i>dynE8</i> allele mutant, gene disruption, <b>8</b> non-producer                                   | This work  |
| QGD08                     | $\Delta orf8$ gene disruption mutant, <b>8</b> producer                                              | This work  |
| QGDU14                    | $\Delta dynU14$ gene disruption mutant, <b>8</b> non-producer                                        | This work  |
| QGDU15                    | $\Delta dynU15$ gene disruption mutant, <b>8</b> non-producer                                        | This work  |
| QGD23                     | $\Delta orf23$ gene disruption mutant, <b>8</b> analog producer                                      | This work  |
| <b>Plasmids</b>           |                                                                                                      |            |
| pEGM®-Teasy               | <i>E. coli</i> subcloning vector                                                                     | This work  |
| pOJ446                    | <i>E. coli-Streptomyces</i> shuttle vector, construction of genomic DNA library                      | Promega    |
| SuperCos1                 | <i>E.coli</i> cloning cosmid vector, Amp <sup>R</sup> ,                                              | This lab   |
| pJST1009                  | <i>M.chersina</i> ATCC53710 genomic library cosmid                                                   | Stratagene |
| pJST1012                  | <i>M.chersina</i> ATCC53710 genomic library cosmid                                                   | This work  |
| pJST1047                  | <i>M.chersina</i> ATCC53710 genomic library cosmid                                                   | This work  |
| pJST1059                  | <i>M.chersina</i> ATCC53710 genomic library cosmid                                                   | This work  |
| pJST1080                  | <i>M.chersina</i> ATCC53710 genomic library cosmid                                                   | This work  |
| pQG9B01                   | A 32 kb <i>Bgl</i> II fragment from pJST1009 in superCos1, template cosmid for PCR targeting         | This work  |
| pQG59B01                  | A 30 kb <i>Bgl</i> II fragment from pJST1059 in superCos1, template cosmid for PCR targeting         | This work  |
| pQGD9001                  | <i>dynE8</i> replacement construct in which <i>dynE8</i> is replaced by <i>aac(3)IV</i> in pQG9B01   | This work  |
| pQGD9008                  | <i>orf8</i> replacement construct in which <i>orf8</i> is replaced by <i>aac(3)IV</i> in pQG9B01     | This work  |
| pQGD9U15                  | <i>dynU15</i> replacement construct in which <i>dynU15</i> is replaced by <i>aac(3)IV</i> in pQG9B01 | This work  |
| pQGD9U14                  | <i>dynU14</i> replacement construct in which <i>dynU14</i> is replaced by <i>aac(3)IV</i> in pQG9B01 | This work  |
| pQGD5923                  | <i>orf23</i> replacement construct in which <i>orf23</i> is replaced by <i>aac(3)IV</i> in pQG59B01  | This work  |
| pQGdynA                   | A 811 bp PCR fragment of <i>dynA</i> in pEGM-Teasy                                                   | This work  |
| pQGdynB                   | A 893 bp PCR fragment of <i>dynB</i> in pEGM-Teasy                                                   | This work  |
| pQGdynD                   | A 1868 bp PCR fragment of <i>dynD</i> in pEGM-Teasy                                                  | This work  |
| <b>Primers</b>            |                                                                                                      |            |
| <i>dynA</i> - Forward (F) | 5'- GCGGTGGCGGTGAGCAGCAAGTAC 3'                                                                      | Enediyne   |
| <i>dynA</i> - Reverse (R) | 5'- GGTCGAAGCGCCAGCCGTCCAGTAC 3'                                                                     | Enediyne   |
| <i>dynB</i> - F           | 5'- TGGGCGTCTCGTCCGACGGCAG 3'                                                                        | Enediyne   |
| <i>dynB</i> - R           | 5'- GGCCCGCCGACCACGAGGAACAG 3'                                                                       | Enediyne   |
| <i>dynD</i> - F           | 5'- GTGGCGTTCGGCTCGGTGATCG 3'                                                                        | Enediyne   |
| <i>dynD</i> - R           | 5'- GACGTTCCCCACGAGGTTCTGCTC 3'                                                                      | Enediyne   |
| DYN-PKSE-gd01F            | 5'TGACCGCGCCCCCTCCGTACGAGCGAGGAGACCGTGATGattccggggatccgtcgacc 3'                                     | Primer a   |
| DYN-PKSE-gd01R            | 5'ACCACGTGCCGGTGGACGTAGCTGTCCGGCCATCTCCTCAgttaggctggagctgcttc 3'                                     | Primer a   |
| Dyn-U14-gdF               | 5' GGACCGGGCCGGCGCCACCCCGGCCACTACGGCGAGTGattccggggatccgtcgacc 3'                                     | Primer a   |
| Dyn-U14-gdR               | 5' CGGACACGGTTCGACCTCCTGTGGCTCGACGGGTCGGCTAtgtaggctggagctgcttc 3'                                    | Primer a   |
| DynU14-ID1F               | 5' CGCCACCCGGACCCTGAC 3'                                                                             | Primer b   |
| DynU14-ID1R               | 5' GCGCGCCTCGACGGTCTC 3'                                                                             | Primer b   |
| dynU14F                   | 5' ATGCCAGTCCCCACCGC 3'                                                                              | Primer c   |
| dynU14R                   | 5' CTACGCGGTCCGGGTGAG 3'                                                                             | Primer c   |
| Dyn-U15-gdF               | 5' TGGAAGTTGCGCCGGGCGCACACCAAGGGGGAGCACATGattccggggatccgtcgacc 3'                                    | Primer a   |
| Dyn-U15-gdR               | 5' TCAGCGTGGGGACGGGGAAGGCGGGGACGCCCGCTCAgttaggctggagctgcttc 3'                                       | Primer a   |
| dynU15-ID1F               | 5' GTCTCCCTCCGACGCTAG 3'                                                                             | Primer b   |
| dynU15-ID1R               | 5' TCCACGGTCCGCTGGGTG 3'                                                                             | Primer b   |
| dynU15F                   | 5' ATGACATCGACGCTCACGCG 3'                                                                           | Primer c   |
| dynU15R                   | 5' TCAGCCGGCGACGTGCCG 3'                                                                             | Primer c   |
| Dyn08-gdF                 | 5'TCACGGATCCGTCCGGCACCAGGGAAAGGGAATGCAGATGattccggggatccgtcgacc 3'                                    | Primer a   |
| Dyn08-gdR                 | 5'CGCGCGCCGCGCGAAACCGGCCCGCCCGGTCATgtaggctggagctgcttc 3'                                             | Primer a   |
| Dyn08-ID1F                | 5' CCCGCCGATCGACTCCAC 3'                                                                             | Primer b   |

---

|            |                                                                   |          |
|------------|-------------------------------------------------------------------|----------|
| Dyn08-ID1R | 5' GCGATCTGCCCGTGCATC 3'                                          | Primer b |
| Dyn08F     | 5' ATGCAGCGGCTCATTGAC 3'                                          | Primer c |
| Dyn08R     | 5' TCAGAAGCAGGTGACCGCC 3'                                         | Primer c |
| Orf23-gdF  | 5' CCGAGGACTGACCGGCCGAGCCGAGGGAGGTGGCGCGTGattccggggatccgtcgacc 3' | Primer a |
| Orf23-gdR  | 5' CAGCAGCTCGACGGACTCCATGCGTCGCTCCCCAGGTCAtgtaggctggagctgcttc 3'  | Primer a |
| Orf23-ID1F | 5' GTGGGTGCGGCTCAACACG 3'                                         | Primer b |
| Orf23-ID1R | 5' CTGCACGGCGAAGAGCAGG 3'                                         | Primer b |
| Orf23F     | 5' ATGAAGGCCGCGCCCTTCG 3'                                         | Primer c |
| Orf23R     | 5' TCAGTGTGTCGGTCGGGCC 3'                                         | Primer c |

---

**Figure S1.** Overview of the key cosmids and probes highlighted in the current study. Solid black bars indicate regions of sequenced *M. chersina* genomic DNA (deposited under GenBank accession number [EF552206](#)).

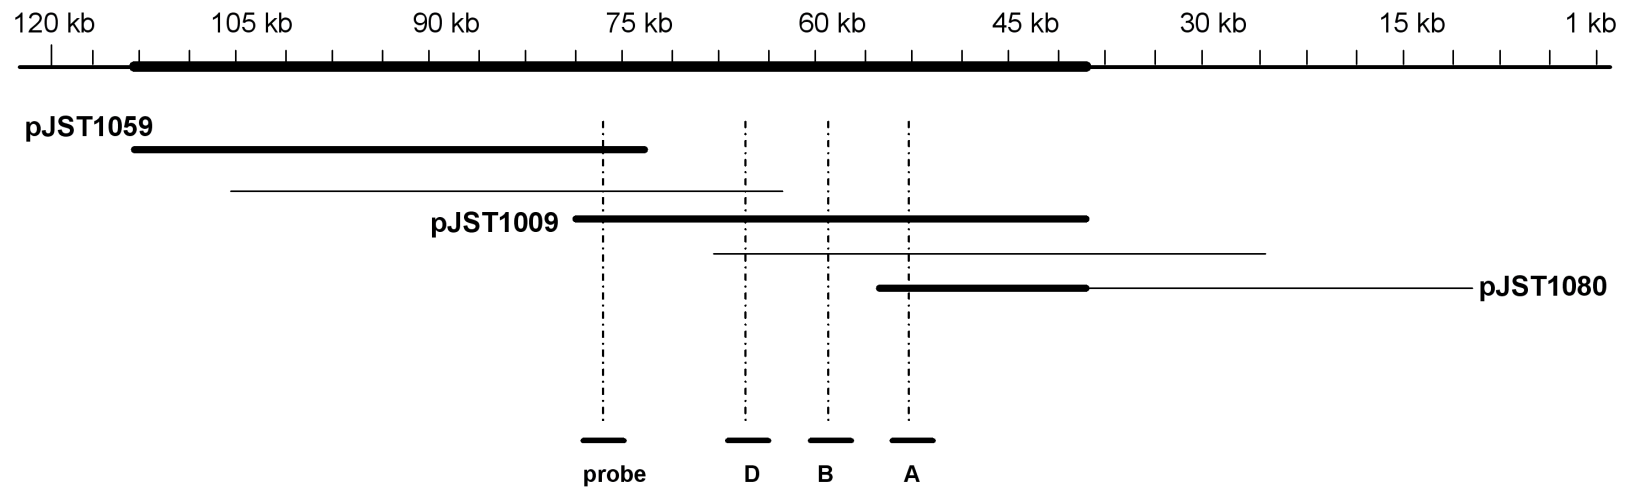

**Figure S2.** Inactivation of *dynE8*, *dynU14*, *dynU15*, *orf8*, and *orf23*. **(A)** Schematic overview of *dynE8* gene replacement mutant QGD01 mutant (A = *AfeI* restriction sites) (upper) and Southern analysis of wild-type and  $\Delta$ *dynE8* (QGD01) *M. chersina* genomic DNA digested with *AfeI* (lower). Lane 1 - molecular weight marker ( $\lambda$ -*HindIII/EcoRI*), lanes 2 and 3 - two representative double crossover isolates, lane 4 - a representative single crossover isolate, and lane 5 - wild type. **(B)** Schematic of  $\Delta$ *dynU14*-inactivation mutant strain QGDU14 (upper) and confirmation of mutant QGDU14 genotype via PCR (lower). Lane 1, 1 kb molecular weight marker; Lane 2 was amplified by primer set "a" (amplification of target disruption cassette) from mutant QGDU14; Lanes 3 and 4 amplified by set "b" (external amplification of target disruption region) from mutant QGDU14 and wild type strain respectively, and Lane 5 by "c" (internal amplification of target gene fragment) from wild type strain. **(C)** Schematic of  $\Delta$ *dynU15*-inactivation mutant strain QGDU15 (upper) and confirmation of mutant QGDU15 genotype via PCR (lower). Lane 1, 1 kb molecular weight marker; Lane 2 was amplified by primer set "a" (amplification of target disruption cassette) from mutant QGDU15; Lanes 3 and 4 amplified by set "b" from mutant QGDU15 and wild type strain respectively, and Lane 5 by "c" from wild type strain. **(D)** Schematic of  $\Delta$ *orf8*-inactivation mutant strain QGD01 (upper) and confirmation of mutant QGD08 genotype via PCR (lower). Lane 1, 1 kb molecular weight marker; 2-4, 5-7, and 8-10, three individual double crossover isolates of QGD08; Lane 11-13, wild type. Lanes 2, 5, 8 and 11 were amplified by primer set "a"; Lanes 3, 6, 9 and 12 were amplified by primer set "b" and Lanes 4, 7, 10 and 13 were amplified by primer set "c". **(E)** Schematic of  $\Delta$ *orf23*-inactivation mutant strain QGD23 (upper) and confirmation of mutant QGD23 genotype via PCR (lower). Lane 1, 1 kb molecular weight marker; Lane 2 was amplified by primer set "a" (amplification of target disruption cassette) from mutant QGD23, Lanes 3 and 4 were amplified by primer set "b" (external amplification of target disruption region) from mutant QGD23 and wild type strain respectively, and Lane 5 was amplified by primer set "c" (internal amplification of *orf23* fragment) from wild type.

(A)

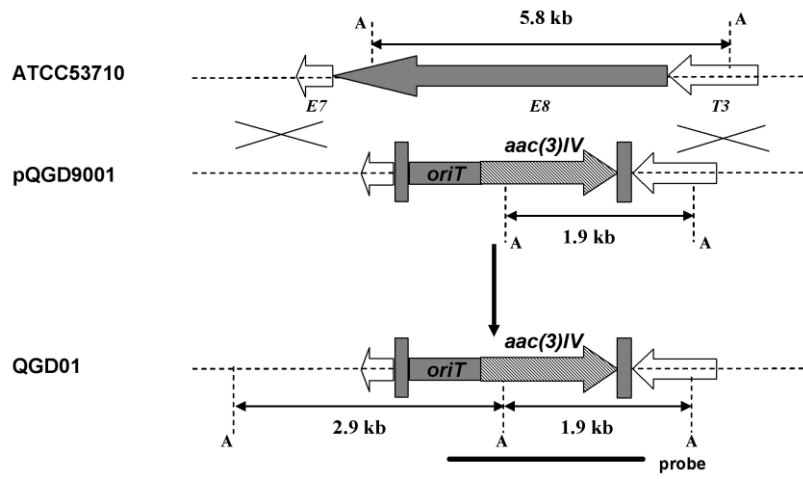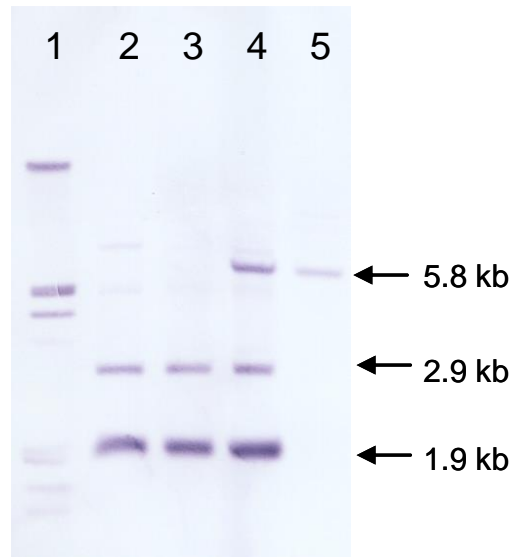

(B)

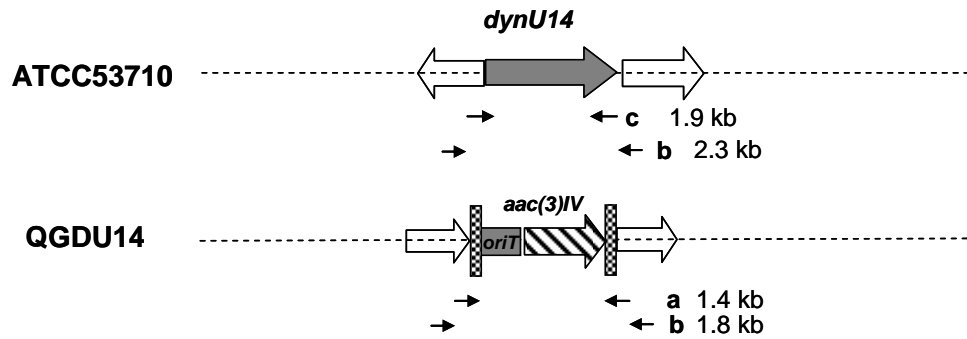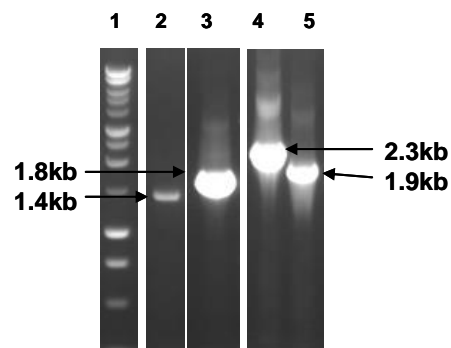

(C)

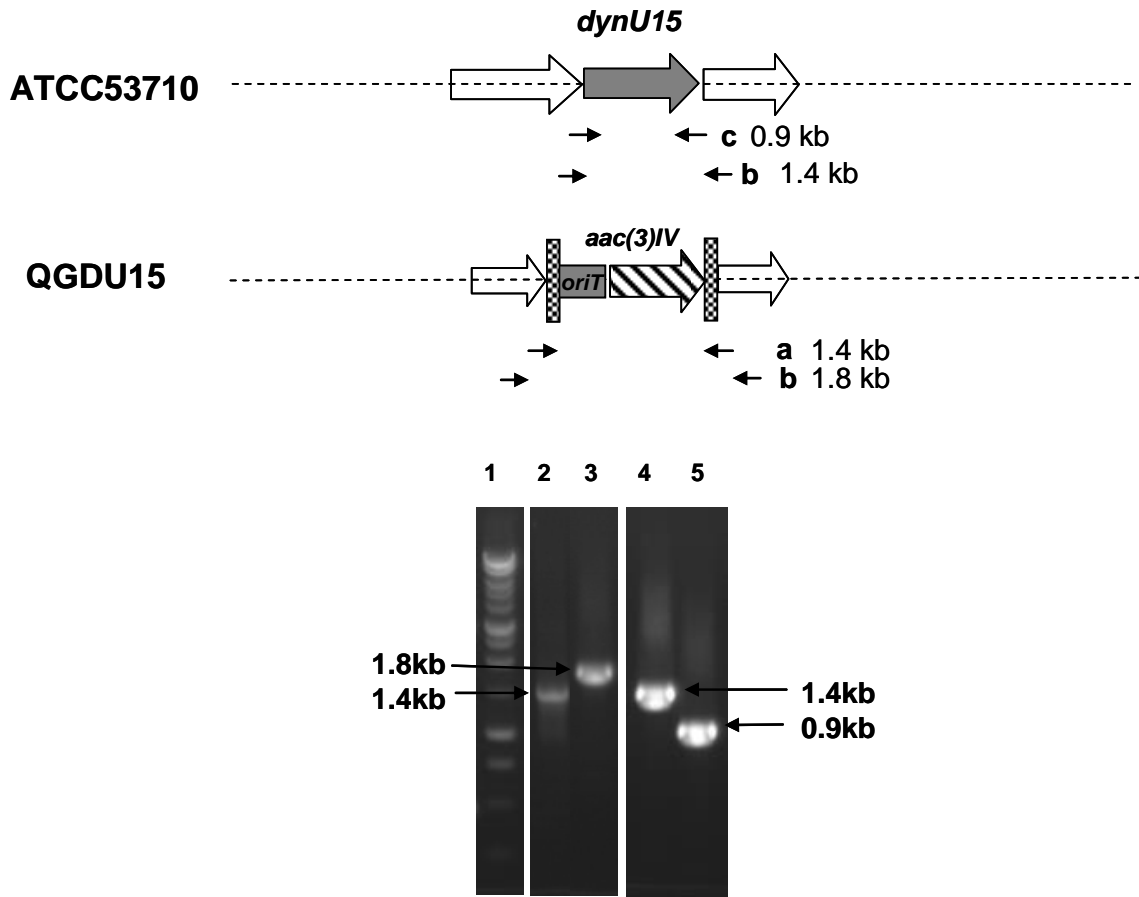

(D)

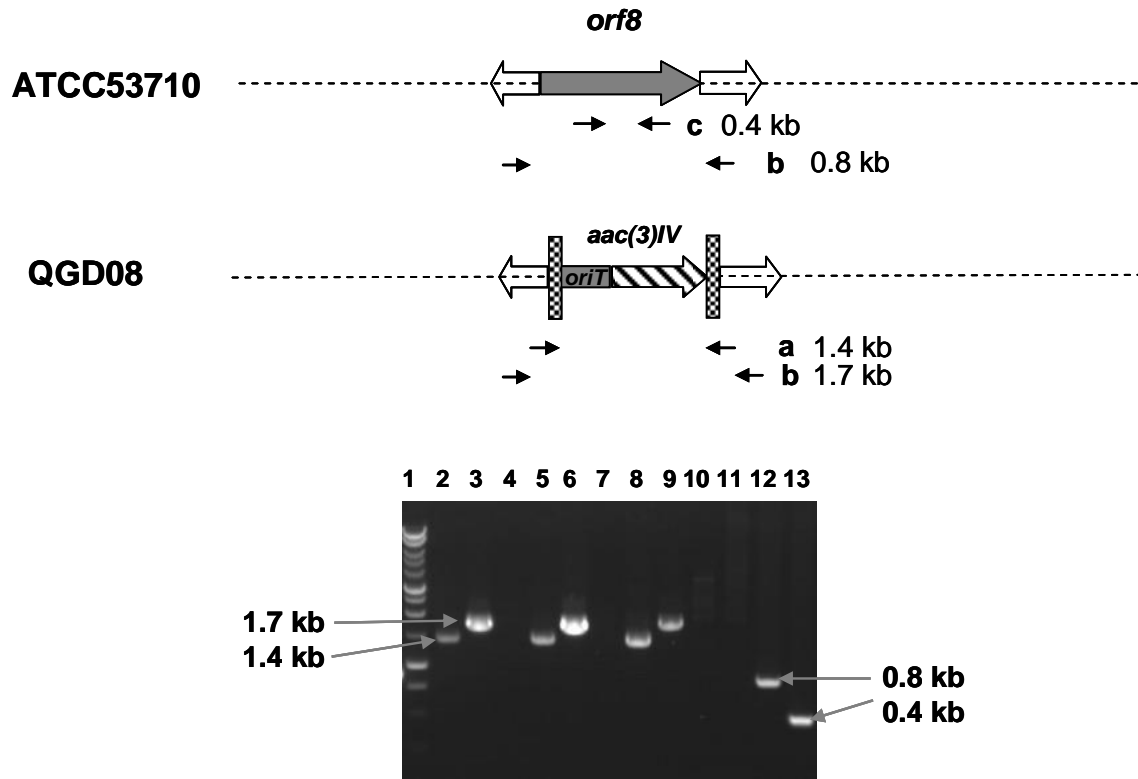

(E)

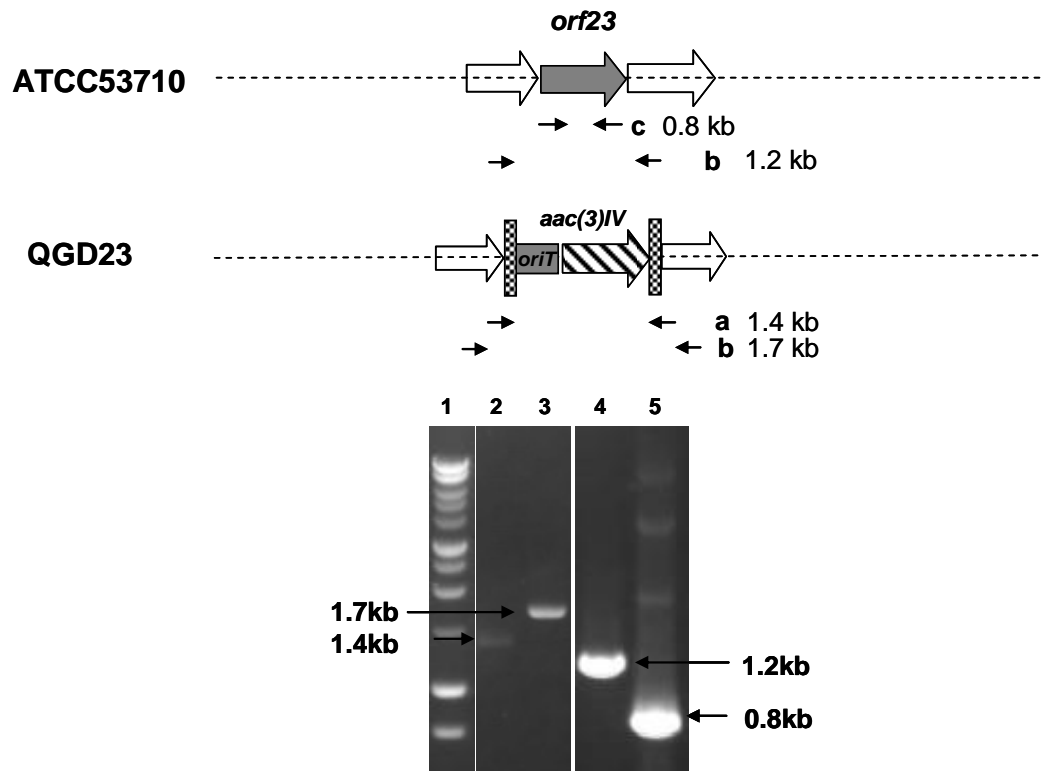

**Figure S3.** HPLC analysis of fermentation extracts from wild-type,  $\Delta dynU14$  (QGDU14), and  $\Delta dynU15$  (QGDU15) *M. chersina* prodigy: (i) wild-type, (ii) QGDU14, (iii) QGDU15. Parameters for analytical HPLC and product characterization are described in Experimental Procedures.

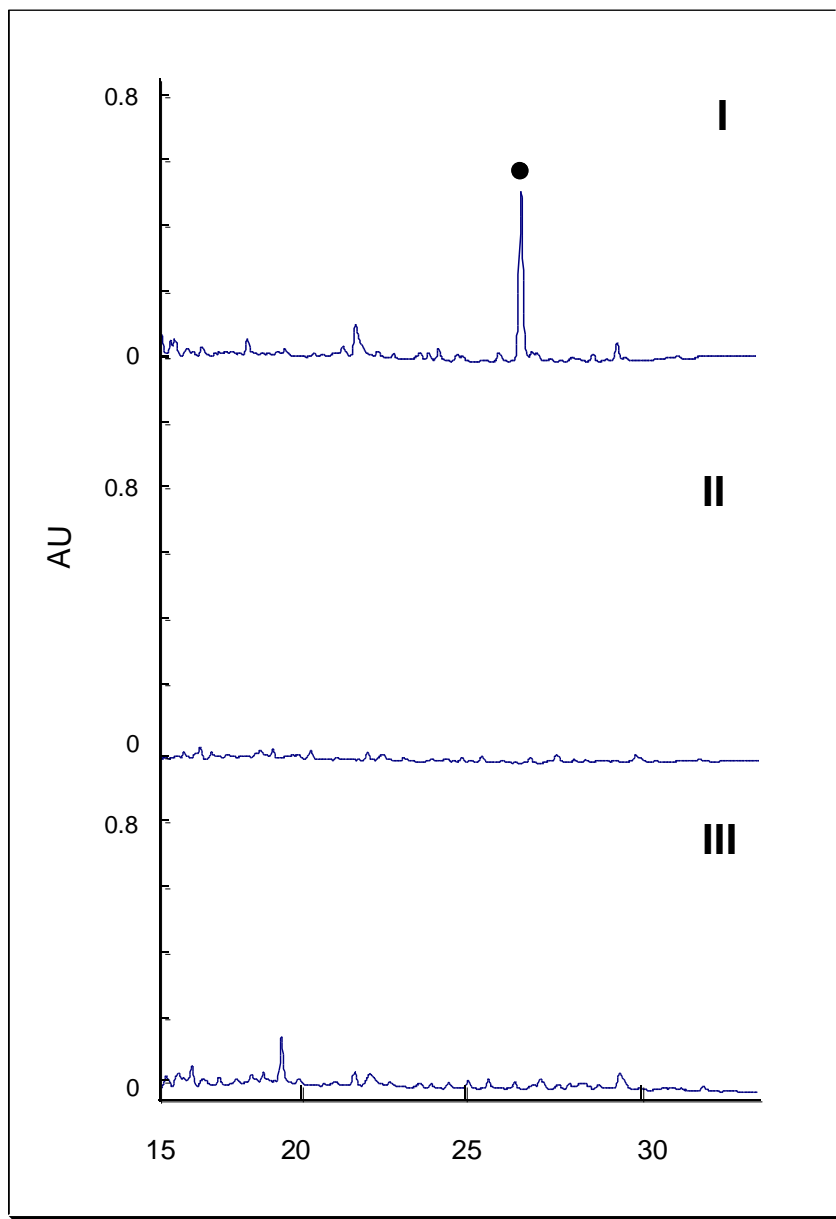

Supplement: NIHMS900160-supplement-online_SI.pdf [file NIHMS900160-supplement-online_SI.pdf]
